# Supplementary material
Source: publisher figshare collection journal article supplement (https://frontiersin.figshare.com/ndownloader/files/24603113)
Supplement: Supplementary file [file 24603113]

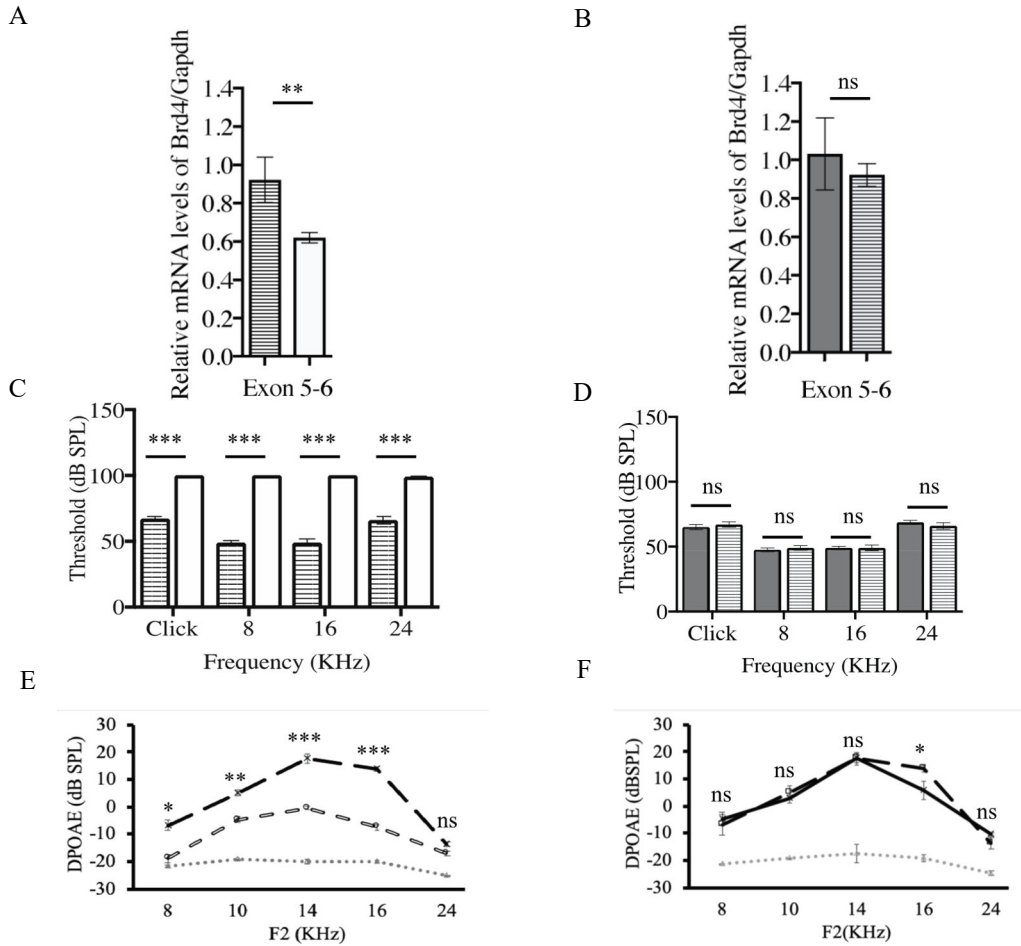

**Supplementary Figure 1. *mBrd4* expression and auditory neuropathy** (A) qRT-PCR results showed that *mBrd4* (Exon 5-6) levels were decreased significantly in (white) *Atoh1-Brd4*<sup>-/-</sup> compared to (striped) *Brd4*<sup>fl/fl</sup> samples (triplicates of each n=4, *Brd4*<sup>fl/fl</sup> and n=4, *Atoh1-Brd4*<sup>-/-</sup> samples). (B) qRT-PCR results showed that *mBrd4* (Exon 5-6) levels had no significant decrease in (grey) *Brd4*<sup>+/+</sup> compared to (striped) *Brd4*<sup>fl/fl</sup> samples (triplicates of each n=3, *Brd4*<sup>+/+</sup> and n=4, *Brd4*<sup>fl/fl</sup> samples) (Standard T-test was performed to determine the significance of the experiment, \* p<0.05, \*\* p<0.01, \*\*\* p<0.001, ns-not significant). (C) The ABR thresholds for click response in (striped) *Brd4*<sup>fl/fl</sup> mice (n=5) were ~67dB SPL and ~100 dB SPL in (white) *Atoh1-Brd4*<sup>-/-</sup> (n=5). For the pure-tone frequencies, *Atoh1-Brd4*<sup>-/-</sup> mice had significantly elevated ABR thresholds (~100dB SPL) compared with control mice. (D) The ABR thresholds for click response in (grey) *Brd4*<sup>+/+</sup> mice (n=4) were ~65dB SPL and ~67 dB SPL in (striped) *Brd4*<sup>fl/fl</sup> (n=5) with no significant difference. Similarly, for the pure-tone frequencies, they had similar thresholds with no significant difference. (E) The DPOAE recordings of (dashed white line) *Atoh1-Brd4*<sup>-/-</sup> (n=5) mice showed reduced amplitudes, from low to high frequencies (8KHz-24 KHz) compared to (dashed black line) *Brd4*<sup>fl/fl</sup> group (n=5). (F) The DPOAE recordings of (black line) *Brd4*<sup>+/+</sup> (n=4) mice showed no significant reduction in amplitudes, compared to (dashed black line) *Brd4*<sup>fl/fl</sup> group (n=5). Noise floor is indicated with a dotted grey line. (Standard T-test was performed to determine the significance of the experiment, \* p<0.05, \*\* p<0.01, \*\*\* p<0.001, ns-not significant).
